# Supplementary material for: Functional group effects on metal–organic framework topology
Source: Royal Society of Chemistry journal article supplement (doi:10.1039/c2cc34938h), 2012-01-01
Supplement: c2cc34938h.pdf [file c2cc34938h.pdf]

# Functional Group Effects on Metal- Organic Framework Topology

Phuong V. Dau, Kristine K. Tanabe, and Seth M. Cohen\*

*Department of Chemistry and Biochemistry, University of California, San Diego, La Jolla, CA  
92092, USA*

## Supplementary Information

\* To whom correspondence should be addressed. E-mail: [scohen@ucsd.edu](mailto:scohen@ucsd.edu). Telephone: (858)

822-5596

## General Methods for Metal-Organic Frameworks Experiments

Starting materials and solvents were purchased and used without further purification from commercial suppliers (Sigma-Aldrich, Alfa Aesar, EMD, TCI, Cambridge Isotope Laboratories, Inc., and others). Proton nuclear magnetic resonance spectra ( $^1\text{H}$  NMR) were recorded by a Varian FT-NMR spectrometer (400 MHz). Chemical shifts were quoted in parts per million (ppm) referenced to the appropriate solvent peak or 0 ppm for TMS. The following abbreviations were used to describe peak patterns when appropriate: br = broad, s = singlet, d = doublet, dd = doublet of doublet, t = triplet, q = quartet, and m = multiplet. Coupling constants,  $J$ , were reported in Hertz unit (Hz). Column chromatography was performed using a CombiFlask automated chromatography system.

## Ligand Synthesis

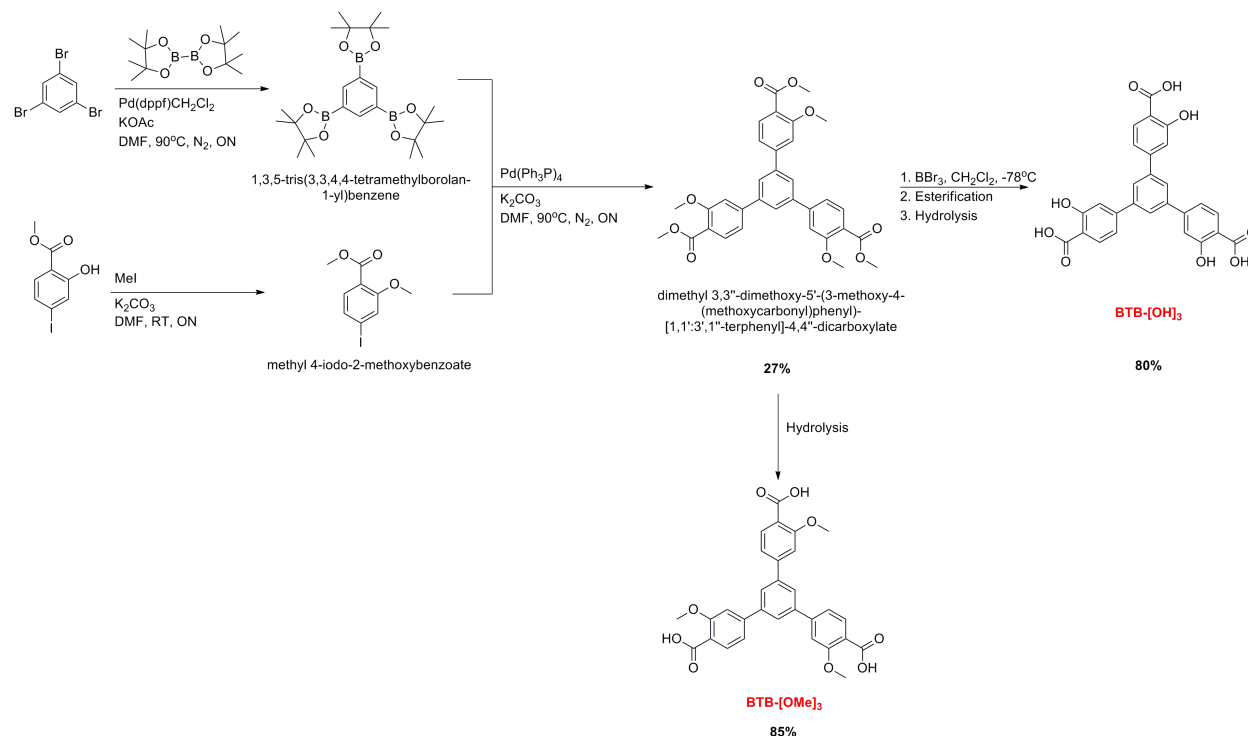

**Scheme S1.** Synthesis of BTB-[OMe]<sub>3</sub> and BTB-[OH]<sub>3</sub> via Pd-coupling reaction.

*Synthesis of 1, 3, 5-tris(3, 3, 4, 4-tetramethylborolan-1-yl)benzene.* 1,3,5-Tribromobenzene (2.0 g, 6.4 mmol), bis(pinacolato)diboron (5.1 g, 20.1 mmol), 1,1'-bis(diphenylphosphino)ferrocene-palladium(II) dichloride dichloromethane (0.16 g, 0.2 mmol), and KOAc (3.8 g, 38.2 mmol) were dissolved in *N,N*-dimethylformamide (DMF, 20 mL). The mixture was heated to 90 °C under N<sub>2</sub> overnight. H<sub>2</sub>O (200 mL) was added to the cooled mixture resulting in a dark black precipitate. Upon filtration, the product was obtained as a black solid (2.2 g), which was used for the next step without any additional purification. <sup>1</sup>H NMR (CDCl<sub>3</sub>): δ 8.36 (s, 3H), δ 1.32 (s, 36H). ESI-MS(+): *m/z* 474.09 [M+NH<sub>4</sub>]<sup>+</sup>.

*Synthesis of methyl 4-iodo-2-methoxybenzoate.* Methyl 2-hydroxy-4-iodobenzoate (4.8 g, 17.3 mmol), and K<sub>2</sub>CO<sub>3</sub> (4.8 g, 34.6 mmol) were added into DMF (20 mL). Iodomethane (2.1 mL, 34.5 mmol) was added and the mixture was stirred at room temperature overnight. K<sub>2</sub>CO<sub>3</sub> was filtered off and the filtrate was used without additional purification. <sup>1</sup>H NMR (CDCl<sub>3</sub>): δ 7.45 (d, 1H, *J* = 8.4 Hz), δ 7.34 (d, 1H, *J* = 8.4 Hz), δ 7.30 (s, 1H), δ 3.84 (s, 3H), δ 3.82 (s, 3H). ESI-MS(+): *m/z* 292.82 [M+H]<sup>+</sup>.

*Synthesis of dimethyl 3,3''-dimethoxy-5'-(3-methoxy-4-(methoxycarbonyl)phenyl)-[1,1':3',1''-terphenyl]-4,4''-dicarboxylate.* 1,3,5-Tris(3, 3, 4, 4-tetramethylborolan-1-yl)benzene (2.2 g, 4.8 mmol), Pd(PPh<sub>3</sub>)<sub>4</sub> (1.0 g, 0.9 mmol), and K<sub>2</sub>CO<sub>3</sub> (10.4 g, 75 mmol) were dissolved in DMF (20 mL). This mixture was added to the methyl 4-iodo-2-methoxybenzoate solution synthesized above. This was heated to 90 °C under N<sub>2</sub> overnight. H<sub>2</sub>O (500 mL) was added to the solution and the mixture was filtered to yield a black solid. The solid was taken up in dichloromethane

(CH<sub>2</sub>Cl<sub>2</sub>, 60 mL), and insoluble by-products were removed by filtration. The organic solution was dried with anhydrous MgSO<sub>4</sub> and removed under vacuum to yield a red brownish solid-gel. The product was purified by using column chromatography (CH<sub>2</sub>Cl<sub>2</sub>/ hexane) to obtain a white solid (750 mg, 1.32 mmol, 27%). <sup>1</sup>H NMR (CDCl<sub>3</sub>): δ 7.94 (d, 3H, *J* = 8 Hz), 7.78 (s, 3H), 7.28 (dd, 3H, *J* = 8 Hz), 7.22 (s, 3H), 4.00 (s, 9H), 3.93 (s, 9H).

*Synthesis of BTB-[OMe]<sub>3</sub>*. Dimethyl 3,3''-dimethoxy-5'-(3-methoxy-4-(methoxycarbonyl)phenyl)-[1,1':3',1''-terphenyl]-4,4''-dicarboxylate (400 mg, 0.7 mmol) was dissolved in tetrahydrofuran (THF, 35 mL) and 4% KOH (35 mL). The mixture was stirred at room temperature overnight. The aqueous layer was collected and then acidified with concentrated HCl to yield a white solid as product (314 mg, 0.6 mmol, 85%). <sup>1</sup>H NMR (DMSO-*d*<sub>6</sub>): δ 8.06 (s, 3H), 7.79 (d, 3H, *J* = 8 Hz), 7.51 (m, 6H, *J* = 8Hz), 3.96 (s, 9H).

*Synthesis of BTB-[OH]<sub>3</sub>*. Dimethyl 3,3''-dimethoxy-5'-(3-methoxy-4-(methoxycarbonyl)phenyl)-[1,1':3',1''-terphenyl]-4,4''-dicarboxylate (400 mg, 0.7 mmol) was dissolved in anhydrous CH<sub>2</sub>Cl<sub>2</sub> (20 mL). The solution was cooled to -78 °C by an isopropanol/dry ice bath under N<sub>2</sub>. BBr<sub>3</sub> (1.0 M in CH<sub>2</sub>Cl<sub>2</sub>, 15 mL, excess) was added slowly and stirred overnight under N<sub>2</sub>. MeOH was added dropwise to quench the excess BBr<sub>3</sub>. The solvent was removed under vacuum to yield an orange solid-gel. The solid-gel was dissolved in MeOH (100 mL) and several drops of concentrated H<sub>2</sub>SO<sub>4</sub> were added. The mixture was heated to reflux overnight. The solvent was removed under vacuum and saturated sodium bicarbonate solution was added. The aqueous solution was extracted with ethyl acetate (EtOAc, 3×100 mL). The

organic layer was dried with anhydrous  $\text{MgSO}_4$  and the solvent was removed under vacuum to yield a white solid. The white solid was dissolved in THF (40 mL) and 4% KOH (40 mL). The mixture was stirred at room temperature overnight. The aqueous solution was then separated and acidified with concentrated HCl to yield a white solid as the final product (272 mg, 0.56 mmol, 80%).  $^1\text{H}$  NMR ( $\text{DMSO}-d_6$ ):  $\delta$  8.04 (s, 3H), 7.89 (d, 3H,  $J = 8$  Hz), 7.54 (s, 3H), 7.49 (d, 3H,  $J = 8$  Hz).

### MOF Synthesis

*Synthesis of MOF-177-OMe.* BTB-[OMe] $_3$  (26 mg, 0.05 mmol) and  $\text{Zn}(\text{NO}_3)_2 \cdot 6\text{H}_2\text{O}$  (47 mg, 0.15 mmol) were dissolved in DMF (10 mL) in a scintillation vial. The vial was then kept in an isothermal oven at 85 °C for 48 h. Clear colorless hexagonal crystals of MOF-177-OMe were obtained and rinsed with DMF (3×10 mL). The solvent was then exchanged with  $\text{CHCl}_3$  (3×10 mL) for 3 d, with fresh  $\text{CHCl}_3$  provided every 24 h. The crystals were stored in  $\text{CHCl}_3$  prior to analysis.

*Synthesis of Zn(II)-MOF-BTB[OH] $_3$ .* BTB-[OH] $_3$  (25 mg, 0.05 mmol) and  $\text{Zn}(\text{NO}_3)_2 \cdot 6\text{H}_2\text{O}$  (47 mg, 0.15 mmol) were dissolved in DMF (2 mL) and  $\text{H}_2\text{O}$  (0.1 mL) in a scintillation vial. The vial was kept in an isotherm oven at 100 °C for 24 h. Clear colorless block crystals were obtained and rinsed with DMF (3×10 mL). The solvent was then exchanged with  $\text{CHCl}_3$  (3×10 mL) for 3 d, with fresh  $\text{CHCl}_3$  provided every 24 h. The crystals were stored in  $\text{CHCl}_3$  prior to analysis.

## MOF Characterization

*Powder X-ray Diffraction (PXRD).* Approximately 20-30 mg of MOF materials were air dried for ~1 min prior to the PXRD analysis. PXRD data was collected at ambient temperature on a Bruker D8 Advance diffractometer using a LynxEye detector at 40 kV, 40 mA for Cu K $\alpha$  ( $\lambda$ = 1.5418 Å), with a scan speed of 1 sec/step, a step size of 0.02°, 2 $\theta$  range of 2-45°.

*Single Crystal X-ray Diffraction.* Single crystals of MOF-177-OMe taken from CHCl<sub>3</sub> were mounted on nylon loops with paratone oil and placed under a nitrogen cold stream (100 K). Data was collected on a Bruker Apex diffractometer using either Cu K $\alpha$  ( $\lambda$ = 1.5418 Å) or Mo K $\alpha$  ( $\lambda$ = 0.71073 Å) radiation controlled using the APEX 2010 software package. In both cases, the diffraction was weak and the resolution is only at ~1.7 Å, even though the exposure time has been set up to 120 second per image. The data was collected up to 1.12 Å. A solution for the structure of MOF-177-OMe was unattainable due to low resolution of the data. Unit cell and space group information are summarized in Table S1 below.

A single crystal of Zn(II)-MOF-BTB-OH taken from CHCl<sub>3</sub> was mounted on nylon loops with paratone oil and placed under a nitrogen cold stream (200 K). Data was collected on a Bruker Apex diffractometer using Mo K $\alpha$  ( $\lambda$ = 0.71073 Å) radiation controlled using the APEX 2010 software package. The diffraction was weak and the resolution was low at ~1 Å. The data was collected up to 0.83 Å. A multi-scan method utilizing equivalents was employed to correct for absorption. All data collections were solved and refined using the SHELXTL software suite.<sup>1</sup> Structures Zn(II)-MOF-BTB-OH was treated with the “SQUEEZE” protocol in PLATON<sup>2</sup> to account for partially occupied or disordered solvent (e.g. CHCl<sub>3</sub> or DMF) within the porous frameworks.

*Digestion and Analysis by  $^1\text{H}$  NMR.* MOF materials (~10 mg) were dried under vacuum at room temperature overnight. MOF materials were then digested with DMSO- $d_6$  (500  $\mu\text{L}$ ) and DCl (50  $\mu\text{L}$ ).

*BET Surface Area Analysis.* 10-30 mg of MOF was evacuated under vacuum for 2 min at room temperature. Samples were then transferred to a pre-weighed sample tube and degassed at 105  $^\circ\text{C}$  on a Micromeritics ASAP 2020 Adsorption Analyzer for a minimum of 12 hours or until the outgas rate was  $<5 \mu\text{mHg/min}$ . The sample tube was re-weighed to obtain a consistent mass for the degassed MOF. Brunauer-Emmett-Teller (BET) surface area ( $\text{m}^2/\text{g}$ ) measurements were collected at 77 K with  $\text{N}_2$  on a Micromeritics ASAP 2020.

*Thermal Analysis.* Approximately 10-15 mg of MOF was used for thermogravimetric analysis (TGA) measurements, which were obtained immediately after collection of gas sorption data (i.e. activated samples). Samples were analyzed under a stream of  $\text{N}_2$  (10  $\text{mL/min}$ ) using a TA Instrument Q600 SDT running from room temperature to 600  $^\circ\text{C}$  with a ramping rate of 5  $^\circ\text{C/min}$ .

*Estimation of the volume of the octahedral cage of  $\text{Zn(II)-MOF-BTB}[\text{OH}]_3$ .* The octahedral cages are assumed to have a regular octahedral shape. Thus, the volume of the octahedral cage can be calculated using the formula  $V = \frac{1}{3} \times \sqrt{2} \times s^3$ , where  $s$  is the side of the octahedral cage (Fig. S3). The side of the pseudo-octahedral cage is estimated by first calculating the centroids of two adjacent SBUs. The distance between these two centroids is the side of the octahedral cage. The volume of the octahedral cage is estimated to be  $\sim 2763 \text{ \AA}^3$ .

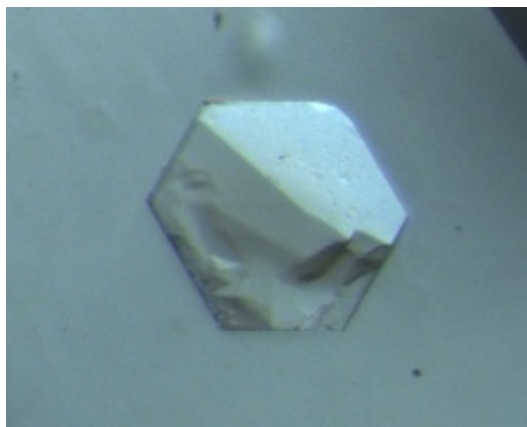

**Figure S1.** Picture of hexagonal crystal of MOF-177-OMe.

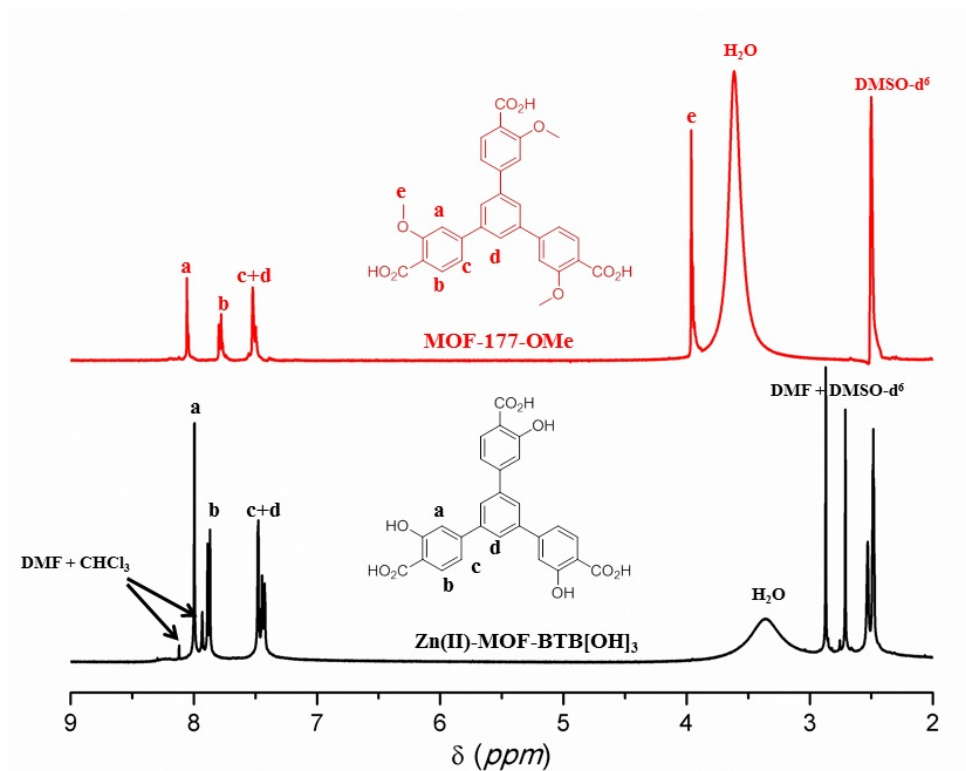

**Figure S2.**  $^1\text{H}$  NMR analysis of digested Zn(II)-MOF-BTB[OH] $_3$  and MOF-177-OMe.



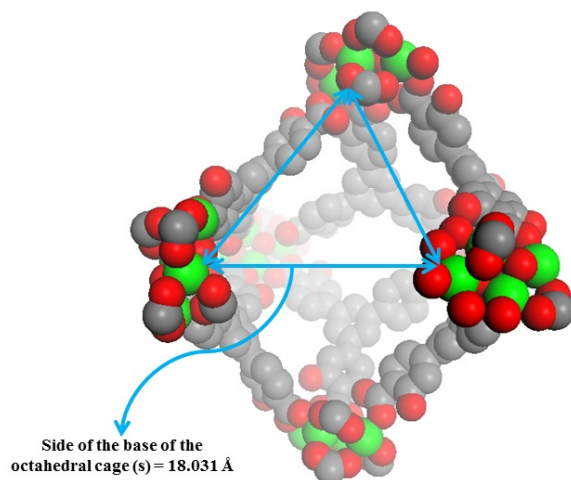

**Figure S3.** Dimension of the space-filling model octahedral cage of Zn(II)-MOF-BTB[OH]<sub>3</sub>.

Color scheme: Carbon (grey), oxygen (red), and zinc (green).

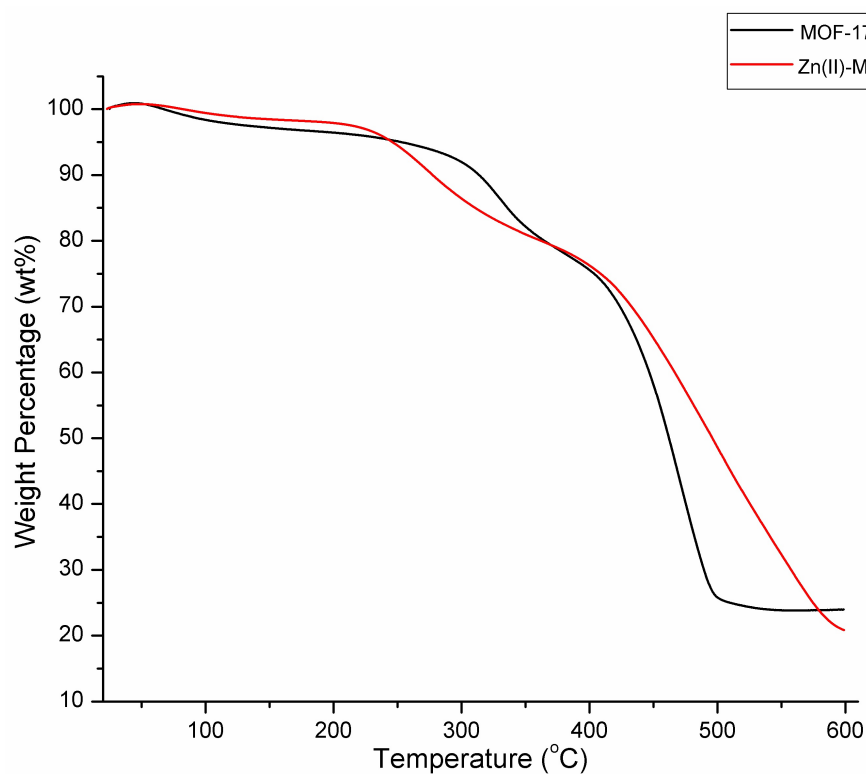

**Figure S4.** Thermogravimetric analysis (TGA) of MOF-177-OMe and Zn(II)-MOF-BTB[OH]<sub>3</sub>.

**Table S1.** Summary of unit cell and space group information of isomers of Zn(II) and H<sub>3</sub>BTB MOFs.

| MOFs        | MOF-39 <sup>3</sup>                                                                                  | Zn/BTB ant <sup>4</sup>                                                                                               | Zn/BTB tsx <sup>4</sup>                                                                 | Zn/BTB dia <sup>4</sup>                                               | MOF-177 <sup>5</sup>                                                                                | MOF-177-<br>OMe                                                                                     |
|-------------|------------------------------------------------------------------------------------------------------|-----------------------------------------------------------------------------------------------------------------------|-----------------------------------------------------------------------------------------|-----------------------------------------------------------------------|-----------------------------------------------------------------------------------------------------|-----------------------------------------------------------------------------------------------------|
| Unit cell   | Orthorhombic<br>a = 17.158 Å<br>b = 21.591 Å<br>c = 25.308 Å<br>$\alpha = \beta = \gamma = 90^\circ$ | Monoclinic<br>a = 26.385 Å<br>b = 28.385 Å<br>c = 31.613 Å<br>$\alpha = \gamma = 90^\circ$<br>$\beta = 113.567^\circ$ | Tetragonal<br>a = b = 13.957 Å<br>c = 28.7133 Å<br>$\alpha = \beta = \gamma = 90^\circ$ | Cubic<br>a = b = c = 25.976 Å<br>$\alpha = \beta = \gamma = 90^\circ$ | Trigonal<br>a = b = 37.072 Å<br>c = 30.033 Å<br>$\alpha = \beta = 90^\circ$<br>$\gamma = 120^\circ$ | Trigonal<br>a = b = 36.629 Å<br>c = 29.660 Å<br>$\alpha = \beta = 90^\circ$<br>$\gamma = 120^\circ$ |
| Space group | <i>Pnma</i> (#62)                                                                                    | <i>C2/c</i> (#15)                                                                                                     | <i>I-42d</i> (#122)                                                                     | <i>F-d3</i> (#203)                                                    | <i>P-31c</i> (#163)                                                                                 | <i>P-31c</i> (#163)                                                                                 |

**Table S2.** Crystal data and structure refinement for Zn(II)-MOF-BTB[OH]<sub>3</sub>.

|                                   |                                                                                               |
|-----------------------------------|-----------------------------------------------------------------------------------------------|
| Identification code               | Zn(II)-MOF-BTB[OH] <sub>3</sub>                                                               |
| Empirical formula                 | C <sub>41</sub> H <sub>27</sub> Cl <sub>6</sub> N O <sub>14</sub> Zn <sub>2</sub>             |
| Formula weight                    | 1101.08                                                                                       |
| Temperature                       | 200(2) K                                                                                      |
| Wavelength                        | 0.71073 Å                                                                                     |
| Crystal system                    | Rhombohedral                                                                                  |
| Space group                       | R-3                                                                                           |
| Unit cell dimensions              | a = b = 36.061(3) Å<br>c = 24.163(3) Å<br>$\alpha = \beta = 90^\circ$<br>$\gamma = 120^\circ$ |
| Volume                            | 27212(5) Å <sup>3</sup>                                                                       |
| Z                                 | 18                                                                                            |
| Density (calculated)              | 1.209 Mg/m <sup>3</sup>                                                                       |
| Absorption coefficient            | 1.108 mm <sup>-1</sup>                                                                        |
| F(000)                            | 9972                                                                                          |
| Crystal size                      | 0.04 x 0.05 x 0.10 mm <sup>3</sup>                                                            |
| Theta range for data collection   | 1.55 to 25.44°.                                                                               |
| Index ranges                      | -43 ≤ h ≤ 21, 0 ≤ k ≤ 43, 0 ≤ l ≤ 29                                                          |
| Reflections collected             | 10180                                                                                         |
| Independent reflections           | 10180 [R(int) = 0.0000]                                                                       |
| Completeness to theta = 25.44°    | 91.0 %                                                                                        |
| Refinement method                 | Full-matrix least-squares on F <sup>2</sup>                                                   |
| Data / restraints / parameters    | 10180 / 3 / 542                                                                               |
| Goodness-of-fit on F <sup>2</sup> | 1.038                                                                                         |
| Final R indices [I > 2σ(I)]       | R1 = 0.1084, wR2 = 0.2983                                                                     |
| R indices (all data)              | R1 = 0.1539, wR2 = 0.3195                                                                     |
| Largest diff. peak and hole       | 2.156 and -1.173 e.Å <sup>-3</sup>                                                            |

## References

1. G. M. Sheldrick, *Acta Cryst.*, 2008, **A64**, 112.
2. A. L. Spek, *Acta Cryst.*, 2009, **D65**, 148-155.
3. J. Kim, B. Chen, T. M. Reineke, H. Li, M. Eddaoudi, D. B. Moler, M. O'Keeffe and O. M. Yaghi, *J. Am. Chem. Soc.*, 2001, **123**, 8239-8247.
4. S. R. Caskey, A. G. Wong-Foy and A. J. Matzger, *Inorg. Chem.*, 2008, **47**, 7751-7756.
5. H. K. Chae, D. Y. Siberio-Perez, J. Kim, Y. B. Go, M. Eddaoudi, A. J. Matzger, M. O'keeffe and O. M. Yaghi, *Nature*, 2004, **427**, 523-527.
